# Supplementary material
Source: publisher figshare collection journal article supplement (https://karger.figshare.com/ndownloader/files/33157325)
Supplement: Supplementary file 1 [file 33157325]

**Table S4**. Count of homozygous mutations in each patient.

| **Patient** | **Homozygous rare ExonVar** | **Homozygous rare ExonVar with mutational impact** |
| --- | --- | --- |
| P1 | 49 | 1 |
| P2 | 57 | 4 |
| P3 | 85 | 10 |
| P4 | 46 | 3 |
| P5 | 39 | 1 |
| P6 | 62 | 6 |
| P7 | 128 | 20 |
| P8 | 74 | 3 |
| P9 | 40 | 0 |
| P10 | 53 | 7 |
